# Supplementary material for: Association of Race With Urine Toxicology Testing Among Pregnant Patients During Labor and Delivery
Source: PubMed Central journal article supplement (PMC10105305; doi:10.1001/jamahealthforum.2023.0441), 2023-04-14
Supplement: jamahealthforum-e230441-s001.pdf [file jamahealthforum-e230441-s001.pdf]

## Data Sharing Statement

Jarlenski. Association of Race With Urine Toxicology Testing Among Pregnant Patients During Labor and Delivery. *JAMA Health Forum*. Published April 14, 2023.

doi:10.1001/jamahealthforum.2023.0441

### Data

**Data available:** No

### Additional Information

**Explanation for why data not available:** The data are from electronic medical records and are not authorized to be shared under the data use agreement.
